# Supplementary material for: Knockdown of Simulated-Solar-Radiation-Sensitive miR-205-5p Does Not Induce Progression of Cutaneous Squamous Cell Carcinoma In Vitro
Source: MDPI journal article supplement (doi:10.3390/ijms242216428), 2023-11-17
Supplement: s1 [file s1]

---

## Supplementary Tables

**Table S1.** miRNAs examined by FirePlex®-Assay. miRNAs in bold were used for normalization. Asterisks indicate miRNAs with an expression of <2.5 a.u. which were excluded from the analysis.

|                       |                       |                  |                       |
|-----------------------|-----------------------|------------------|-----------------------|
| hsa-let-7c-5p         | hsa-mir-26b-5p        | hsa-mir-126-3p   | <b>hsa-mir-221-3p</b> |
| <b>hsa-let-7f-5p</b>  | <b>hsa-mir-29a-3p</b> | hsa-mir-130a-3p  | hsa-mir-296-5p*       |
| hsa-let-7i-5p         | hsa-mir-29b-3p        | hsa-mir-135b-5p  | hsa-mir-378i*         |
| hsa-mir-7-5p          | <b>hsa-mir-29c-3p</b> | hsa-mir-146a-5p  | hsa-mir-424-5p        |
| hsa-mir-9-5p*         | hsa-mir-30a-3p        | hsa-mir-148a-3p  | hsa-mir-495-3p        |
| <b>hsa-mir-15a-5p</b> | <b>hsa-mir-30b-5p</b> | hsa-mir-155-5p   | hsa-mir-503-5p        |
| hsa-mir-19b-3p        | hsa-mir-30d-5p        | hsa-mir-181a-3p* | <b>hsa-mir-16-5p</b>  |
| hsa-mir-21-5p         | hsa-mir-31-5p         | hsa-mir-181a-5p  | hsa-mir-101-3p*       |
| <b>hsa-mir-22-3p</b>  | hsa-mir-32-5p         | hsa-mir-183-5p   | hsa-mir-378g*         |
| <b>hsa-mir-23a-3p</b> | hsa-mir-34a-5p        | hsa-mir-200a-3p  | hsa-mir-382-5p*       |
| <b>hsa-mir-23b-3p</b> | hsa-mir-34c-5p        | hsa-mir-200b-3p  | hsa-mir-1246*         |
| <b>hsa-mir-24-3p</b>  | hsa-mir-92a-3p        | hsa-mir-203a-3p  | hsa-mir-4454*         |
| <b>hsa-mir-26a-5p</b> | hsa-mir-125b-5p*      | hsa-mir-205-5p   |                       |

---

**Table S2.** Primer sequences for qPCR.

| Gene          | Forward (5'→ 3')        | Reverse (5' → 3' )     |
|---------------|-------------------------|------------------------|
| <i>ACTB</i>   | TTCCTGGGCATGGAGTC       | CAGGTCTTTGCGGATGTC     |
| <i>BCL2</i>   | GATAACGGAGGCTGGGATGC    | GGCAGGCATGTTGACTTCAC   |
| <i>CDH1</i>   | CTCCTGAAAAGAGAGTGGAAG   | GCAGTGTCTCTCCAAATCCG   |
| <i>ERBB2</i>  | GGCACAGTCTACAAGGGCAT    | AGGGCATAAGCTGTGTCACC   |
| <i>HPRT1</i>  | TGACACTGGCAAAACAATGCA   | GGTCCTTTTCACCAGCAAGCT  |
| <i>INPPL1</i> | ATGCCTCAGATGGGGAGGAT    | CTCACAGCTTCCAGGTCCAG   |
| <i>ITGA5</i>  | GCCGATTCACATCGCTCTC     | TCTTCTCCACAGTCCAGCAAG  |
| <i>MMP13</i>  | CCTTGATGCCATTACCAGTCTCC | AAACAGCTCCGCATCAACCTGC |
| <i>TBP</i>    | TTCGGAGAGTTCTGGGATTGTA  | TGGACTGTTCTTCACTCTTGGC |
| <i>VEGFA</i>  | CATGCCAAGTGGTCCCAGG     | GGTCTCGATTGGATGGCAGT   |
| <i>ZEB1</i>   | ACCTGCCAACAGACCAGAC     | TTCCTGTGTCATCCTCCCAG   |
| <i>ZEB2</i>   | CCACGATCCAGACCGCAAT     | CCAGGTGGCAGGTCATTTTCT  |

Table S3. miR-205 target genes and function.

| Target gene   | Gene function                                        | Association to cSCC carcinogenesis                 |
|---------------|------------------------------------------------------|----------------------------------------------------|
| <i>BCL2</i>   | Membrane protein of the outer mitochondrial membrane | Inhibition of apoptosis [65]                       |
| <i>ERBB2</i>  | Receptor tyrosine kinase                             | Cell growth, survival [66]                         |
| <i>INPPL1</i> | Phosphatase                                          | Inhibition of cell migration in keratinocytes [42] |
| <i>ITGA5</i>  | Integrin                                             | Migration, survival [67]                           |
| <i>MMP13</i>  | Proteinase                                           | Proliferation, migration, invasion [68]            |
| <i>VEGFA</i>  | Growth factor                                        | Proliferation, survival [65]                       |
| <i>ZEB1</i>   | Zink finger protein                                  | EMT induction [69]                                 |
| <i>ZEB2</i>   | Zink finger protein                                  | EMT induction [16]                                 |
